# Supplementary material for: Determination of Critical Limit of Zinc for Rice (Oryza sativa L.) and Potato (Solanum tuberosum L.) Cultivation in Floodplain Soils of Bangladesh
Source: MDPI journal article supplement (doi:10.3390/su14010167), 2021-12-24
Supplement: s1 [file s1]

## Supplementary file

**Table S1.** Critical limit of soil available Zn for rice by statistical method.

| Sl.No | Soil available Zn (µg/g) in population-1 | Bray's per cent yield | Last value in population-1 | Mean Bray's per cent yield in population-1 | Correlated SS of deviations from mean of population-1 | Mean Bray's per cent yield in population-2 | Correlated of deviations from mean of population-2 | Postulated critical limit | R <sup>2</sup> for Postulated critical limit |
|-------|------------------------------------------|-----------------------|----------------------------|--------------------------------------------|-------------------------------------------------------|--------------------------------------------|----------------------------------------------------|---------------------------|----------------------------------------------|
| 1     | 0.16                                     | 83.97                 |                            |                                            |                                                       |                                            |                                                    |                           |                                              |
| 2     | 0.24                                     | 84.52                 | 0.24                       | 84.25                                      | 0.15                                                  | 90.82                                      | 421.73                                             | 0.26                      | 0.185                                        |
| 3     | 0.28                                     | 85.62                 | 0.28                       | 85.07                                      | 1.41                                                  | 90.82                                      | 384.50                                             | 0.33                      | 0.255                                        |
| 4     | 0.38                                     | 85.69                 | 0.38                       | 85.66                                      | 2.14                                                  | 90.82                                      | 343.55                                             | 0.39                      | 0.333                                        |
| 5     | 0.4                                      | 86.98                 | 0.4                        | 86.34                                      | 5.44                                                  | 91.18                                      | 313.51                                             | 0.43                      | 0.384                                        |
| 6     | 0.46                                     | 87.52                 | 0.46                       | 87.25                                      | 9.34                                                  | 91.55                                      | 285.43                                             | 0.49                      | 0.431                                        |
| 7     | 0.52                                     | 86.79                 | 0.52                       | 87.16                                      | 10.33                                                 | 91.90                                      | 243.82                                             | 0.55                      | 0.509                                        |
| 8     | 0.58                                     | 86.22                 | 0.58                       | 86.51                                      | 10.44                                                 | 92.29                                      | 186.66                                             | 0.63                      | 0.619                                        |
| 9     | 0.68                                     | 86.42                 | 0.68                       | 86.32                                      | 10.66                                                 | 92.64                                      | 122.50                                             | 0.69                      | 0.743                                        |
| 10    | 0.7                                      | 88.07                 | 0.7                        | 87.25                                      | 14.63                                                 | 93.01                                      | 72.88                                              | 0.73                      | 0.831                                        |
| 11    | 0.75                                     | 90.22                 | 0.75                       | 89.15                                      | 29.47                                                 | 93.48                                      | 42.39                                              | 0.77                      | 0.861                                        |
| 12    | 0.79                                     | 91.27                 | 0.79                       | 90.75                                      | 49.92                                                 | 94.09                                      | 16.79                                              | <b>0.85</b>               | <b>0.871</b>                                 |
| 13    | 0.91                                     | 94.54                 | 0.91                       | 92.91                                      | 103.22                                                | 94.79                                      | 11.77                                              | 0.93                      | 0.778                                        |
| 14    | 0.94                                     | 95.49                 | 0.94                       | 95.02                                      | 162.12                                                | 95.46                                      | 9.33                                               | 1.14                      | 0.669                                        |
| 15    | 1.34                                     | 95.02                 | 1.34                       | 95.26                                      | 206.89                                                | 96.04                                      | 3.75                                               | 1.35                      | 0.593                                        |
| 16    | 1.35                                     | 95.99                 | 1.35                       | 95.51                                      | 258.70                                                | 96.64                                      | 0.48                                               | 1.80                      | 0.500                                        |
| 17    | 2.24                                     | 97.52                 | 2.24                       | 96.76                                      | 326.69                                                | 96.94                                      | 0.16                                               | 2.51                      | 0.369                                        |
| 18    | 2.78                                     | 98                    | 2.78                       | 97.76                                      | 394.60                                                | 97.18                                      | 0.11                                               | 2.80                      | 0.238                                        |
| 19    | 2.81                                     | 98.5                  | 2.81                       | 98.25                                      | 463.18                                                | 97.61                                      |                                                    |                           |                                              |
| 20    | 3.17                                     | 98.03                 | 3.17                       | 98.27                                      | 517.92                                                | 98.01                                      |                                                    |                           |                                              |

**Table S2.** Critical limit of plant Zn for rice by statistical method.

| Sl. No | Plant Zn (µg/g) in population-1 | Bray's per cent yield | Last value in population-1 | Mean Bray's per cent yield in population-1 | Correlated SS of deviations from mean of population-1 | Mean Bray's per cent yield in population-2 | Correlated of deviations from mean of population-2 | Postulated critical limit | R <sup>2</sup> for Postulated critical limit |
|--------|---------------------------------|-----------------------|----------------------------|--------------------------------------------|-------------------------------------------------------|--------------------------------------------|----------------------------------------------------|---------------------------|----------------------------------------------|
| 1      | 16.57                           | 83.97                 |                            |                                            |                                                       |                                            |                                                    |                           |                                              |
| 2      | 13.53                           | 84.52                 | 13.53                      | 84.25                                      | 0.15                                                  | 90.82                                      | 421.73                                             | 14.39                     | 0.185                                        |
| 3      | 15.24                           | 85.62                 | 15.24                      | 85.07                                      | 1.41                                                  | 90.82                                      | 384.50                                             | 14.88                     | 0.255                                        |
| 4      | 14.52                           | 85.69                 | 14.52                      | 85.66                                      | 2.14                                                  | 90.82                                      | 343.55                                             | 16.00                     | 0.333                                        |
| 5      | 17.48                           | 86.98                 | 17.48                      | 86.34                                      | 5.44                                                  | 91.18                                      | 313.51                                             | 19.99                     | 0.384                                        |
| 6      | 22.5                            | 87.52                 | 22.5                       | 87.25                                      | 9.34                                                  | 91.55                                      | 285.43                                             | 20.79                     | 0.431                                        |
| 7      | 19.07                           | 86.79                 | 19.07                      | 87.16                                      | 10.33                                                 | 91.90                                      | 243.82                                             | 20.20                     | 0.509                                        |
| 8      | 21.32                           | 86.22                 | 21.32                      | 86.51                                      | 10.44                                                 | 92.29                                      | 186.66                                             | 21.18                     | 0.619                                        |
| 9      | 21.04                           | 86.42                 | 21.04                      | 86.32                                      | 10.66                                                 | 92.64                                      | 122.50                                             | 23.52                     | 0.743                                        |
| 10     | 25.99                           | 88.07                 | 25.99                      | 87.25                                      | 14.63                                                 | 93.01                                      | 72.88                                              | 25.55                     | 0.831                                        |
| 11     | 25.1                            | 90.22                 | 25.1                       | 89.15                                      | 29.47                                                 | 93.48                                      | 42.39                                              | 23.87                     | 0.861                                        |
| 12     | 22.64                           | 91.27                 | 22.64                      | 90.75                                      | 49.92                                                 | 94.09                                      | 16.79                                              | <b>24.32</b>              | <b>0.871</b>                                 |
| 13     | 25.99                           | 94.54                 | 25.99                      | 92.91                                      | 103.22                                                | 94.79                                      | 11.77                                              | 26.18                     | 0.778                                        |

|    |       |       |       |       |        |       |      |       |       |
|----|-------|-------|-------|-------|--------|-------|------|-------|-------|
| 14 | 26.36 | 95.49 | 26.36 | 95.02 | 162.12 | 95.46 | 9.33 | 26.03 | 0.669 |
| 15 | 25.7  | 95.02 | 25.7  | 95.26 | 206.89 | 96.04 | 3.75 | 26.50 | 0.593 |
| 16 | 27.3  | 95.99 | 27.3  | 95.51 | 258.70 | 96.64 | 0.48 | 27.76 | 0.500 |
| 17 | 28.21 | 97.52 | 28.21 | 96.76 | 326.69 | 96.94 | 0.16 | 29.41 | 0.369 |
| 18 | 30.61 | 98    | 30.61 | 97.76 | 394.60 | 97.18 | 0.11 | 30.52 | 0.238 |
| 19 | 30.42 | 98.5  | 30.42 | 98.25 | 463.18 | 97.61 |      |       |       |
| 20 | 31.4  | 98.03 | 31.4  | 98.27 | 517.92 | 98.01 |      |       |       |

**Table S3.** Critical limit of soil available Zn for potato by statistical method.

| Sl.No | Soil available Zn (µg/g) in population-1 | Bray's per cent yield | Last value in population-1 | Mean Bray's per cent yield in population-1 | Correlated SS of deviations from mean of population-1 | Mean Bray's per cent yield in population-2 | Correlated of deviations from mean of population-2 | Postulated critical limit | R <sup>2</sup> for Postulated critical limit |
|-------|------------------------------------------|-----------------------|----------------------------|--------------------------------------------|-------------------------------------------------------|--------------------------------------------|----------------------------------------------------|---------------------------|----------------------------------------------|
| 1     | 0.16                                     | 72.22                 |                            |                                            |                                                       |                                            |                                                    |                           |                                              |
| 2     | 0.24                                     | 75.26                 | 0.24                       | 73.74                                      | 4.62                                                  | 87.09                                      | 621.16                                             | 0.26                      | 0.388                                        |
| 3     | 0.28                                     | 77.08                 | 0.28                       | 76.17                                      | 12.06                                                 | 87.09                                      | 481.17                                             | 0.33                      | 0.517                                        |
| 4     | 0.38                                     | 81.08                 | 0.38                       | 79.08                                      | 41.14                                                 | 87.09                                      | 410.16                                             | 0.39                      | 0.558                                        |
| 5     | 0.4                                      | 81.94                 | 0.4                        | 81.51                                      | 65.60                                                 | 87.88                                      | 344.84                                             | 0.43                      | 0.598                                        |
| 6     | 0.46                                     | 83.41                 | 0.46                       | 82.68                                      | 94.55                                                 | 88.58                                      | 294.17                                             | 0.49                      | 0.620                                        |
| 7     | 0.52                                     | 83.33                 | 0.52                       | 83.37                                      | 114.56                                                | 89.25                                      | 234.42                                             | 0.55                      | 0.659                                        |
| 8     | 0.58                                     | 83.23                 | 0.58                       | 83.28                                      | 128.85                                                | 89.77                                      | 162.96                                             | 0.63                      | 0.714                                        |
| 9     | 0.68                                     | 86.13                 | 0.68                       | 84.68                                      | 165.67                                                | 90.29                                      | 125.01                                             | 0.69                      | 0.716                                        |
| 10    | 0.7                                      | 85.92                 | 0.7                        | 86.03                                      | 193.01                                                | 90.78                                      | 76.44                                              | <b>0.73</b>               | <b>0.736</b>                                 |
| 11    | 0.75                                     | 87.87                 | 0.75                       | 86.90                                      | 236.42                                                | 91.35                                      | 44.53                                              | 0.79                      | 0.725                                        |
| 12    | 0.79                                     | 88.91                 | 0.79                       | 88.39                                      | 285.56                                                | 92.03                                      | 17.36                                              | 0.83                      | 0.704                                        |
| 13    | 0.91                                     | 92.31                 | 0.91                       | 90.61                                      | 379.94                                                | 92.56                                      | 12.18                                              | 0.89                      | 0.616                                        |
| 14    | 0.94                                     | 92.65                 | 0.94                       | 92.48                                      | 466.84                                                | 93.23                                      | 7.07                                               | 1.14                      | 0.536                                        |
| 15    | 1.34                                     | 93.82                 | 1.34                       | 93.24                                      | 563.05                                                | 93.82                                      | 5.13                                               | 1.35                      | 0.444                                        |
| 16    | 1.35                                     | 93.91                 | 1.35                       | 93.87                                      | 648.84                                                | 94.44                                      | 2.55                                               | 1.80                      | 0.363                                        |
| 17    | 2.24                                     | 96.01                 | 2.24                       | 94.96                                      | 764.13                                                | 94.74                                      | 2.43                                               | 2.51                      | 0.250                                        |
| 18    | 2.78                                     | 96.1                  | 2.78                       | 96.06                                      | 868.40                                                | 95.09                                      | 2.06                                               | 2.80                      | 0.148                                        |
| 19    | 2.81                                     | 94.34                 | 2.81                       | 95.22                                      | 931.53                                                | 95.35                                      |                                                    |                           |                                              |
| 20    | 3.17                                     | 96.37                 | 3.17                       | 95.36                                      | 1022.09                                               | 95.71                                      |                                                    |                           |                                              |

**Table S4.** Critical limit of plant' Zn for potato by statistical method.

| Sl.No | Plant Zn (µg/g) in population-1 | Bray's per cent yield | Last value in population-1 | Mean Bray's per cent yield in population-1 | Correlated SS of deviations from mean of population-1 | Mean Bray's per cent yield in population-2 | Correlated of deviations from mean of population-2 | Postulated critical limit | R <sup>2</sup> for Postulated critical limit |
|-------|---------------------------------|-----------------------|----------------------------|--------------------------------------------|-------------------------------------------------------|--------------------------------------------|----------------------------------------------------|---------------------------|----------------------------------------------|
| 1     | 17.76                           | 72.22                 |                            |                                            |                                                       |                                            |                                                    |                           |                                              |
| 2     | 21.53                           | 75.26                 | 21.53                      | 73.74                                      | 4.62                                                  | 87.09                                      | 621.16                                             | 20.11                     | 0.388                                        |
| 3     | 18.68                           | 77.08                 | 18.68                      | 74.85                                      | 12.06                                                 | 87.09                                      | 481.17                                             | 18.96                     | 0.517                                        |
| 4     | 19.23                           | 81.08                 | 19.23                      | 76.41                                      | 41.14                                                 | 87.09                                      | 410.16                                             | 21.23                     | 0.558                                        |
| 5     | 23.23                           | 81.94                 | 23.23                      | 77.52                                      | 65.60                                                 | 87.88                                      | 344.84                                             | 22.90                     | 0.598                                        |
| 6     | 22.56                           | 83.41                 | 22.56                      | 78.50                                      | 94.55                                                 | 88.58                                      | 294.17                                             | 23.10                     | 0.620                                        |
| 7     | 23.63                           | 83.33                 | 23.63                      | 79.19                                      | 114.56                                                | 89.25                                      | 234.42                                             | 23.98                     | 0.659                                        |

|    |       |       |       |       |         |       |        |              |              |
|----|-------|-------|-------|-------|---------|-------|--------|--------------|--------------|
| 8  | 24.32 | 83.23 | 24.32 | 79.69 | 128.85  | 89.77 | 162.96 | 24.69        | 0.714        |
| 9  | 25.06 | 86.13 | 25.06 | 80.41 | 165.67  | 90.29 | 125.01 | 26.14        | 0.716        |
| 10 | 27.21 | 85.92 | 27.21 | 80.96 | 193.01  | 90.78 | 76.44  | <b>26.61</b> | <b>0.736</b> |
| 11 | 26    | 87.87 | 26    | 81.59 | 236.42  | 91.35 | 44.53  | 27.97        | 0.725        |
| 12 | 29.93 | 88.91 | 29.93 | 82.20 | 285.56  | 92.03 | 17.36  | 30.36        | 0.704        |
| 13 | 30.79 | 92.31 | 30.79 | 82.98 | 379.94  | 92.56 | 12.18  | 31.60        | 0.616        |
| 14 | 32.4  | 92.65 | 32.4  | 83.67 | 466.84  | 93.23 | 7.07   | 35.12        | 0.536        |
| 15 | 37.84 | 93.82 | 37.84 | 84.34 | 563.05  | 93.82 | 5.13   | 37.34        | 0.444        |
| 16 | 36.84 | 93.91 | 36.84 | 84.94 | 648.84  | 94.44 | 2.55   | 38.96        | 0.363        |
| 17 | 41.07 | 96.01 | 41.07 | 85.59 | 764.13  | 94.74 | 2.43   | 43.13        | 0.250        |
| 18 | 45.19 | 96.1  | 45.19 | 86.18 | 868.40  | 95.09 | 2.06   | 46.24        | 0.148        |
| 19 | 47.28 | 94.34 | 47.28 | 87.41 | 931.53  | 95.35 |        |              |              |
| 20 | 47.81 | 96.37 | 47.81 | 88.58 | 1022.09 | 95.71 |        |              |              |

---
